# Supplementary material for: Transcriptomic dissection of the rice – Burkholderia glumae interaction
Source: PubMed Central journal article supplement (PMC4165909; doi:10.1186/1471-2164-15-755), 2014-09-03

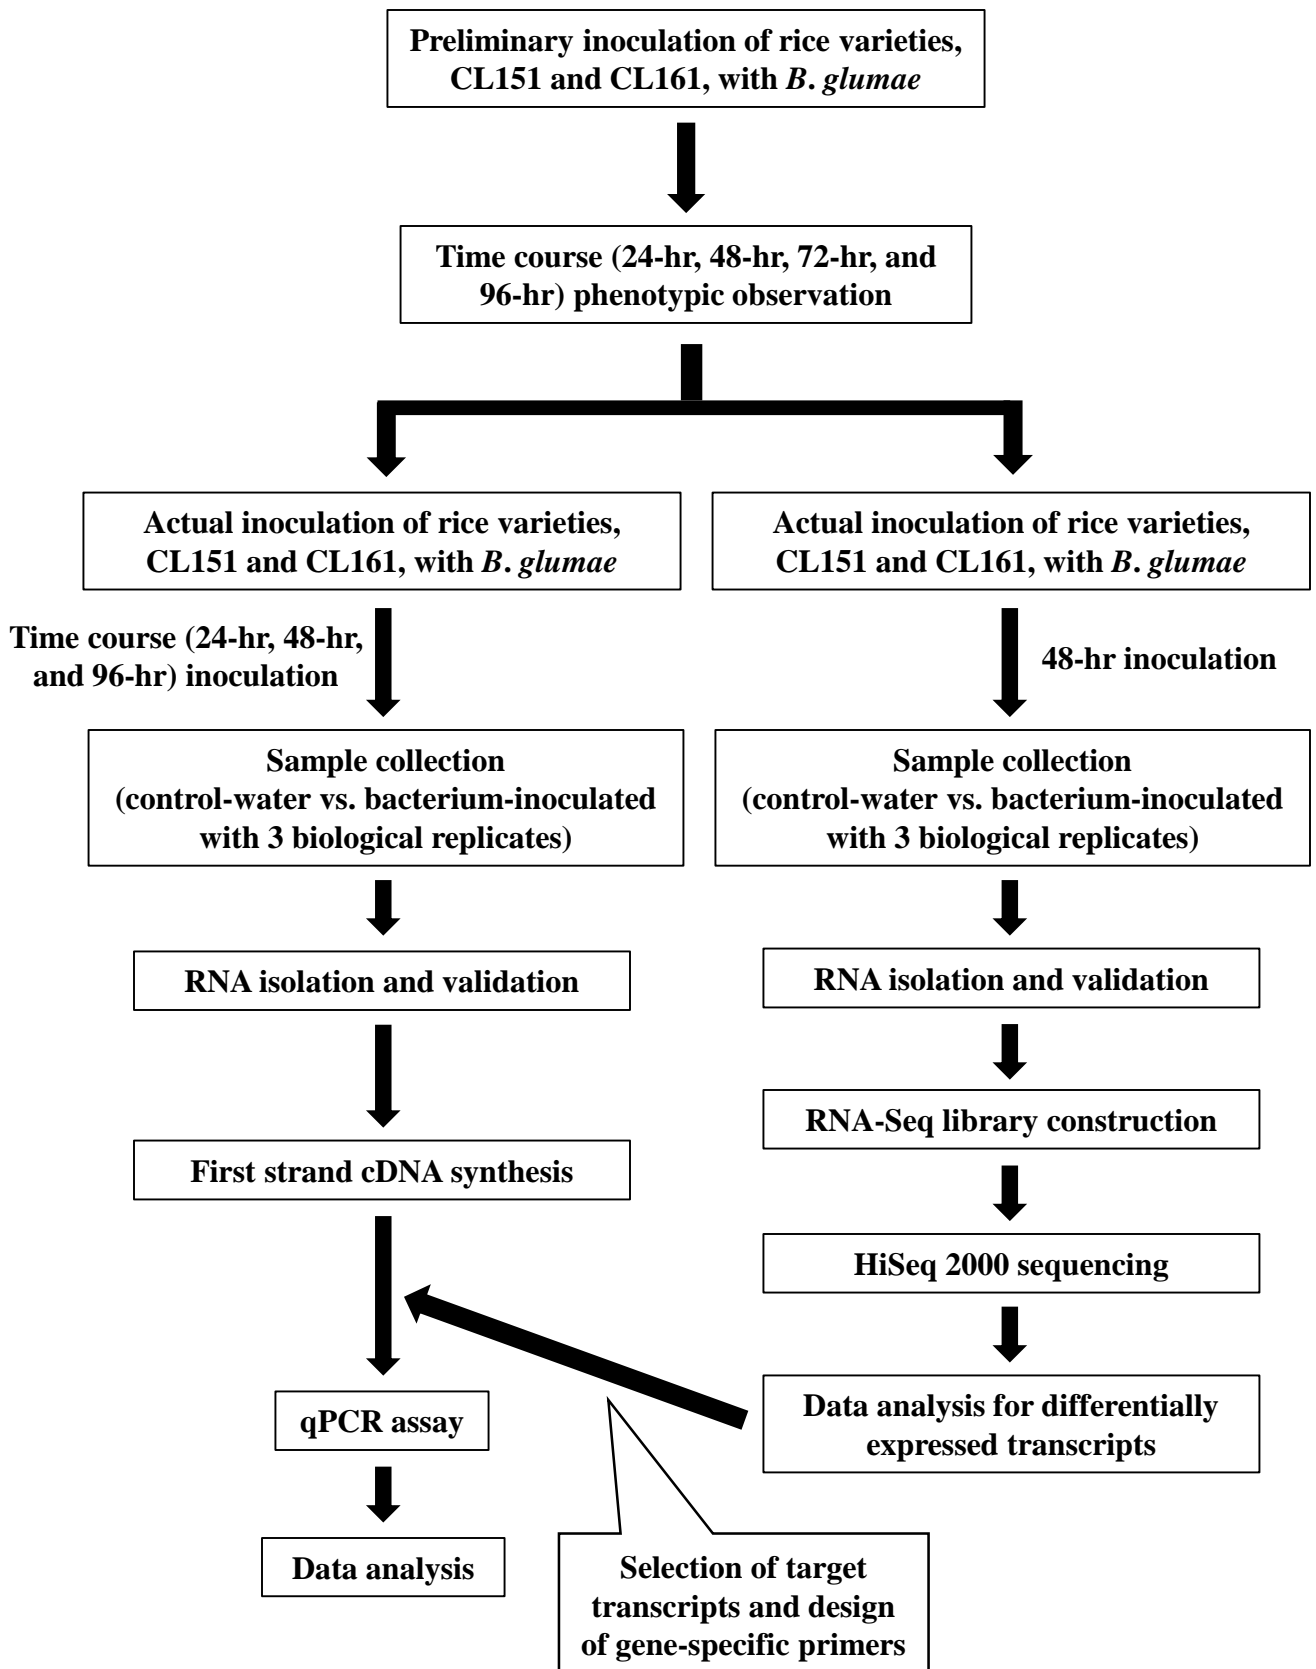

Supplement: 12864_2014_6437_MOESM4_ESM.pdf [file 12864_2014_6437_MOESM4_ESM.pdf]
